# Supplementary material for: External quality assessment for detection of methylated Syndecan 2 (SDC2) in China
Source: publisher site journal article supplement (doi:10.1515/cclm-2022-0206), 2022-08-09
Supplement: Supplementary file 2 [file j_cclm-2022-0206_suppl_001.docx]

| **Supplemental Table 1** Qualitative results of 32 laboratories. | | | | | | | | |
| --- | --- | --- | --- | --- | --- | --- | --- | --- |
| Lab | No. | | | | | | | |
| 2121 | 2122 | 2123 | 2124 | 2125 | 2126 | 2127 | 2128 |
| 1 | + | + | + | + | - | - | - | + |
| 2 | + | + | + | + | - | - | - | + |
| 3 | + | + | + | + | - | - | - | + |
| 4 | + | + | + | + | - | - | - | + |
| 5 | + | + | + | + | - | - | - | + |
| 6 | + | + | + | + | - | - | - | + |
| 7 | + | + | + | + | - | - | - | + |
| 8 | + | - | + | + | - | + | - | + |
| 9 | + | + | + | + | - | - | - | + |
| 10 | + | + | + | + | - | - | - | - |
| 11 | + | + | + | + | - | - | - | + |
| 12 | + | + | + | + | - | - | - | + |
| 13 | + | + | + | + | - | - | - | + |
| 14 | + | + | + | + | - | - | - | + |
| 15 | + | + | + | + | - | - | - | + |
| 16 | + | + | + | + | - | - | - | + |
| 17 | + | + | + | + | + | - | - | + |
| 18 | + | + | + | + | - | - | - | + |
| 19 | + | + | + | + | - | - | - | + |
| 20 | + | + | + | + | - | - | - | + |
| 21 | + | + | + | + | - | - | - | + |
| 22 | + | + | + | + | - | - | - | + |
| 23 | + | + | + | + | - | - | - | + |
| 24 | + | + | + | + | - | - | - | + |
| 25 | + | + | + | + | - | - | - | + |
| 26 | + | + | + | + | - | - | - | + |
| 27 | + | + | + | + | - | - | - | + |
| 28 | + | + | + | + | - | - | - | + |
| 29 | + | + | + | + | - | - | - | + |
| 30 | + | + | + | + | - | - | - | + |
| 31 | + | + | + | + | - | - | - | + |
| 32 | + | + | + | + | - | - | - | + |

| **Supplemental Table 2** Quantitative results of 32 laboratories. | | | |  |  |  |  |  |  |
| --- | --- | --- | --- | --- | --- | --- | --- | --- | --- |
| Lab | Assay | No. | | | | | | | |
| 2121 | 2122 | 2123 | 2124 | 2125 | 2126 | 2127 | 2128 |
| 1 | Creative Biosciencesa | 31.91 | 34.11 | 35.61 | 36.88 | 0.00 | 0.00 | 0.00 | 31.29 |
| 2 | 33.26 | 34.44 | 35.19 | 37.41 | 0.00 | 0.00 | 0.00 | 30.17 |
| 3 | 31.70 | 33.66 | 36.06 | 37.29 | 0.00 | 0.00 | 0.00 | 30.85 |
| 4 | 29.54 | 32.01 | 34.18 | 36.72 | 0.00 | 0.00 | 0.00 | 30.34 |
| 5 | 30.20 | 34.04 | 35.58 | 36.23 | 0.00 | 0.00 | 0.00 | 30.15 |
| 6 | 29.58 | 33.19 | 33.99 | 35.12 | 0.00 | 0.00 | 0.00 | 29.97 |
| 7 | 30.35 | 32.31 | 34.49 | 35.50 | 0.00 | 0.00 | 0.00 | 29.88 |
| 8 | 30.10 | 0.00 | 36.73 | 30.55 | 0.00 | 35.78 | 0.00 | 34.24 |
| 9 | 31.15 | 34.16 | 35.38 | 37.85 | 0.00 | 0.00 | 0.00 | 31.14 |
| 10 | 31.67 | 33.80 | 35.25 | 37.21 | 0.00 | 0.00 | 0.00 | 31.59 |
| 11 | 30.65 | 32.49 | 34.27 | 36.35 | 0.00 | 0.00 | 0.00 | 30.36 |
| 12 | 30.76 | 32.36 | 34.52 | 36.07 | 0.00 | 0.00 | 0.00 | 30.84 |
| 13 | 32.12 | 35.02 | 35.80 | 37.95 | 0.00 | 0.00 | 0.00 | 31.64 |
| 14 | 31.58 | 33.65 | 35.91 | 37.45 | 0.00 | 0.00 | 0.00 | 30.65 |
| 15 | 31.28 | 33.21 | 34.93 | 37.82 | 0.00 | 0.00 | 0.00 | 30.12 |
| 16 | 32.20 | 33.00 | 35.96 | 37.52 | 0.00 | 0.00 | 0.00 | 30.09 |
| 17 | 33.66 | 35.66 | 37.28 | 37.78 | 0.00 | 0.00 | 0.00 | 32.21 |
| 18 | 30.30 | 32.39 | 34.06 | 36.46 | 0.00 | 0.00 | 0.00 | 30.69 |
| 19 | 32.11 | 33.18 | 36.41 | 35.87 | 0.00 | 0.00 | 0.00 | 30.72 |
| 20 | 29.90 | 31.80 | 33.72 | 35.60 | 0.00 | 0.00 | 0.00 | 30.30 |
| 21 | 30.48 | 32.14 | 33.55 | 35.54 | 0.00 | 0.00 | 0.00 | 30.51 |
| 22 | 30.26 | 32.09 | 34.33 | 35.81 | 0.00 | 0.00 | 0.00 | 30.42 |
| 23 | 31.17 | 33.78 | 35.67 | 36.78 | 0.00 | 0.00 | 0.00 | 31.86 |
| 24 | 29.91 | 32.21 | 33.34 | 37.30 | 0.00 | 0.00 | 0.00 | 30.19 |
| 25 | 31.00 | 33.43 | 35.49 | 36.97 | 0.00 | 0.00 | 0.00 | 29.96 |
| 26 | 31.79 | 33.74 | 35.48 | 37.77 | 0.00 | 0.00 | 0.00 | 32.24 |
| 27 | 31.20 | 32.90 | 35.10 | 37.30 | 0.00 | 0.00 | 0.00 | 30.60 |
| 28 | 30.81 | 32.71 | 34.73 | 37.19 | 0.00 | 39.00 | 0.00 | 31.00 |
| 29 | 30.67 | 33.11 | 36.81 | 37.65 | 0.00 | 0.00 | 0.00 | 31.24 |
| 30 | 31.36 | 33.89 | 35.38 | 37.05 | 0.00 | 0.00 | 0.00 | 30.97 |
| 31 | 30.15 | 32.06 | 34.19 | 36.02 | 0.00 | 0.00 | 0.00 | 30.57 |
| 32 | AmoyDx b,c | 2.44 | 4.04 | 6.36 | undetected | 11.44 | 10.90 | undetected | 0.24b |
| 10.71 | 5.01 | 5.14 | 5.38 | 12.44 | undetected | undetected | 2.58c |
| a: Ct values were exhibited in the table. | | | | | |  |  |  |  |
| b,c: ΔCT values were exhibited in the table for A mix (b) and B mix (c). | | | | | |  |  |  |  |
